# Supplementary material
Source: publisher figshare collection journal article supplement (https://diabetesjournals.figshare.com/ndownloader/files/34928604)
Supplement: Supplementary file 1 [file 34928604]

## **Supplementary Materials**

### **Nrf2 Regulates $\beta$ -cell Mass by Suppressing Cell Death and Promoting Proliferation**

**Supplemental Table 1: Primers sequences used in this paper for qPCR**

| <b>Gene Name</b> | <b>Forward sequence</b>    | <b>Reverse Sequence</b>    |
|------------------|----------------------------|----------------------------|
| ACTIN            | AGCCATGTACGTAGCCATCC       | CTCTCAGCTGTGGTGGTGAA       |
| NRF2             | AGGACATGGAGCAAGTTTGG       | TTCTTTTCCAGCGAGGAGA        |
| NQO1             | GAAGGAGGCTGCTGTAGAGG       | ATCACCAGGTCTGCAGCTTC       |
| KEAP1            | GATCGGCTGCACTGAACTG        | GGACTCGCAGCGTACGTT         |
| CCNA1            | CACAGAGAACCGTGCTAGGG       | CACTTTCTTCCAGCCGCAG        |
| CCNA2            | GAGGGCGATCCTTGTGGAT        | CACAGCCAAATGCAGGGTCT       |
| CCNB1            | TGTGTGTGAACCAGAGGTGGA      | AGATGTTTCCATCGGGCTTGGAGA   |
| CCNB2            | GGCTGGTCCAAGTCCATTCC       | GTCCATGATGGCAATGCACA       |
| CCNB3            | TTGCTGAACTTCCGATCCCA       | TTGCTTGCTCAAAGGAGGGA       |
| CCND1            | CAGAAGTGCGAAGAGGAGGTC      | TCATCTTAGAGGCCACGAACAT     |
| CCND2            | TGTGGATTGTCTCAAAGCCTG      | CAACATCCCGCACGTCTGTA       |
| CCNE1            | GACACAGCTTCGGGGTGC         | AACTCAGACCTGGGAGGACA       |
| CCNE2            | TGCTGCCGCCTTATGTCATT       | TCGGAGATGTCATCCCATTCC      |
| CDK1             | CTGCAGCTCGGAGCACAGTT       | CCAGAACACGGAGGCACTTG       |
| CDK2             | AGCCAAGTTTCCCAAGTGG        | TTTGGGAAGGGCATCAGAGC       |
| CDK4             | AGACCAGGACCTGAGGACAT       | TCAGGTCCCGGTGAACAATG       |
| CDK6             | GGCTATGGGAAGGTGTTCAA       | GGGCTCTGGAACCTTATCCA       |
| CDC25A           | CACGGGGAAGATGCTGTTTG       | AACAAGACAGGATGCCCAGC       |
| P15              | GGGGGCAAGTGGAGACGG         | CTTCCCGAGCTGCGTCGT         |
| P16              | GTCTTTGTGTACCGCTGGGA       | GCCGGATTTAGCTCTGCTCT       |
| P18              | ACGTCAACGCTCAAAATGGA       | TGGGATTAGCACCTCTGAGGA      |
| P21              | GTGGCCTTGTGCTGTCTT         | GCGCTTGGAGTGATAGAAATCTG    |
| P27              | GGTGGACCAAATGCCTGACT       | TGGCCCTTTTGTGTTTGCGAA      |
| P57              | GGTGTCCCTCTCAAACGTG        | TGCCCAGCAAGTTCTCTCTG       |
| INS1             | TAT AAA GCT GGT GGG CAT CC | GGG ACC ACA AAG ATG CTG T  |
| INS2             | TTT GTC AAG CAG CAC CTT T  | AGG TTT TCT CGC CCC TTA AC |
| MAFA             | ATCATCACTCTGCCCACCAT       | AGTCGGATGACCTCCTCCTT       |
| GLUT2            | GGCACAGACACCCCACTTAC       | GCCAACATTGCTTTGATCCT       |
| PDX1             | CTCCGGACATCTCCCCATAC       | ACGGGTCCTCTTGTTTTCTT       |
| NKX6.1           | CGCCCGGGCTCTACTTTAG        | GTCCAGAGAACGTGGGTCTG       |

|        |                        |                         |
|--------|------------------------|-------------------------|
| PGD    | CTCGGTGCTTGTCTCTCTG    | TTGAGGGTCCAGCCAAACTC    |
| G6PD   | CAACAGGATCTTTGGCCCCA   | ACGGACATCATCTGAACCTGT   |
| IDH1   | AGCTTCATCGCAACCCAGAA   | GTAATAAGCCGGCCCCAGTT    |
| HO1    | CGCATATACCCGCTACCTGG   | TTACCTTGCACCAGGCTAGC    |
| GCLC   | GGACAAACCCCAACCATCC    | GTTGAACTCAGACATCGTTCCT  |
| GCLM   | CTTCGCCTCCGATTGAAGATG  | AAAGGCAGTCAAATCTGGTGG   |
| CAT    | GGAGGCGGGAACCCAATAG    | GTGTGCCATCTCGTCAGTGAA   |
| SOD1   | AACCAGTTGTGTTGTCAGGAC  | CCACCATGTTTCTTAGAGTGAGG |
| SOD2   | TGGACAAACCTGAGCCCTAAG  | CCCAAAGTCACGCTTGATAGC   |
| GPX1   | CCACCGTGTATGCCTTCTCC   | AGAGAGACGCGACATTCTCAAT  |
| GST-M  | CTGAAGGTGGAATACTTGGAGC | GCCCAGGAACTGTGAGAAGA    |
| TRX1   | CCCTTCTTCCATTCCCTCT    | TCCACATCCACTTCAAGGAAC   |
| TXNRD1 | GTGGCGACTTGGCTAATC     | ACCAGGAGAGACACTCAC      |

**Supplemental Table 2: Human donor cadaveric islets used in this paper**

| <b>Donor ID</b>     | <b>Age<br/>(years)</b> | <b>Sex</b> | <b>Race</b> | <b>%HbA1c<br/>(%mmol/mol)</b> | <b>BMI</b> | <b>COVID19</b> | <b>Cause<br/>of<br/>Death</b> | <b>Used in</b> |
|---------------------|------------------------|------------|-------------|-------------------------------|------------|----------------|-------------------------------|----------------|
| <b>SAMN1295912</b>  | 37                     | F          | C           | 5.3 (34)                      | 26.3       | N/A            | S                             | Fig. 6D-E      |
| <b>SAMN13570019</b> | 37                     | F          | C           | 5.2 (33)                      | 24         | N/A            | A                             | Fig. 6D-E      |
| <b>SAMN13881228</b> | 34                     | M          | H           | 5.6 (38)                      | 28.1       | N/A            | HT                            | Fig. 6D-E      |
| <b>SMN12713942</b>  | 41                     | M          | C           | 5.2 (33)                      | 23.5       | N/A            | S                             | Fig. 6F        |
| <b>SAMN12924398</b> | 38                     | M          | H           | 5.4 (36)                      | 28         | N/A            | HT                            | Fig. 6F        |
| <b>SAMN1295912</b>  | 37                     | F          | C           | 5.3 (34)                      | 26.3       | N/A            | S                             | Fig. 6F        |
| <b>SAMN16427178</b> | 42                     | F          | C           | 5.5 (37)                      | 31.2       | Negative       | S                             | Fig. 6J-K      |
| <b>SAMN13881228</b> | 34                     | M          | H           | N/A                           | 28.1       | N/A            | HT                            | Fig. 6J-K      |
| <b>HP-20220-01</b>  | 48                     | M          | AF          | 5.2 (33)                      | 20.2       | N/A            | S                             | Fig. 6J-K      |
| <b>HP-20152-01</b>  | 21                     | M          | H           | 5.1 (32)                      | 27.3       | Negative       | HT                            | Fig. 6J-K      |
| <b>HP-20199-01</b>  | 48                     | F          | C           | 5.8 (40)                      | 30.9       | Negative       | S                             | Fig. 6J-K      |
| <b>SAMN21400456</b> | 54                     | M          | C           | 5.3 (34)                      | 29.3       | Negative       | HT                            | Fig. 6D-F      |
| <b>SAMN22814513</b> | 26                     | M          | C           | 5.4 (36)                      | 29.2       | Negative       | HT                            | Fig. 6D-F      |

M = males; F = female; H = Hispanic; C = Caucasian; AF = African American; HT = Head trauma; S = Stroke; A = Anoxia

**Supplemental Table 3: Antibodies used in this paper**

| <b>Antibody</b>                     | <b>Brand and Catalogue number</b>                                                      | <b>Used in Figures</b>                                           |
|-------------------------------------|----------------------------------------------------------------------------------------|------------------------------------------------------------------|
| Insulin                             | Dako #A056401 RRID:AB_2617169                                                          | 1B-D, 1F-H, 4B-D,6A-E                                            |
| Insulin                             | Genetex #GTX39371<br>RRID:AB_11177138                                                  | 2A-F, 2I-K, 3A-D, 3G-H, 5E-F,5I-J,<br>5M-R, 6H-I, Supp Fig 3A-B, |
| Insulin                             | Developmental Studies Hybridoma Bank,<br>University of Iowa, GN-ID4<br>RRID:AB_2255626 | 6J-K, Supp Fig 6E.                                               |
| Insulin                             | R&D #MAB1417 RRID:AB_2126533                                                           | 2N-O, 3E-F                                                       |
| Ki67                                | Invitrogen #MA5-14520<br>RRID:AB_10979488                                              | 1F-G, 2I-J,4C-D, J,6A-E,-6H-K,<br>Supp Fig 2B                    |
| Nrf2 (C-Term)                       | Santa Cruz sc-722 RRID:AB_2108502                                                      | 1C, 1H, Supp Fig. 1B                                             |
| Nrf2 (C-Term)                       | Cayman Chemicals #10214                                                                | 2A,2E,5E-F                                                       |
| Nrf2-p                              | Abcam #ab76026 RRID:AB_1524049                                                         | 1B,1D, 4B, Supp Fig 1C, Supp Fig<br>1E, Supp Fig 6B.             |
| Nrf2                                | Proteintech #16396-1-AP<br>RRID:AB_2782956                                             | 2G-H, 5G-H                                                       |
| Nqo1                                | Abcam #ab2346 RRID:AB_302995                                                           | 2C                                                               |
| Keap1                               | Cell Signaling #8047s<br>RRID:AB_10860776                                              | Supp Fig.2A                                                      |
| Keap1                               | Abcam #ab227828                                                                        | 5C-D                                                             |
| Anti-DNA/RNA<br>Oxidative<br>Damage | Abcam #ab62623 RRID:AB_940049                                                          | 3G-H                                                             |
| Pdx1                                | Abcam #AB47308 RRID:AB_777178                                                          | 3E-F                                                             |
| Cyclin D1                           | Proteintech #60186-1-Ig<br>RRID:AB_10793718                                            | 5K-L                                                             |
| Cre<br>recombinase                  | Millipore Sigma #MAB3120<br>RRID:AB_2085748                                            | Supp Fig.1G-H                                                    |

**Supp. Figure 1. Acute exposure of INS1 to high glucose stimulates  $\beta$ -cell proliferation.** (A) INS-1 832/13 cells pre-treated with a ROS-sensitive probe, H2DCFDA, were cultured in 20 mM glucose for 5-20 min. 100  $\mu$ M H<sub>2</sub>O<sub>2</sub> was used as a positive control. Generation of intracellular ROS was measured by plate reader (Ex/Em: 495/520 nm) according to the manufacture's instructions. (B) INS-1 832/13 cells were cultured in 20 mM glucose for up to 48 h. The cells were fixed and immunolabeled using an Nrf2 antibody. (C) INS-1 832/13 cells were cultured in 2 mM or 20 mM glucose for 5 min in the presence or absence of the antioxidant agent N-acetylcysteine (NAC) (20 mM). 100  $\mu$ M H<sub>2</sub>O<sub>2</sub> was used as a positive control. The cells were fixed and immunolabeled using an Nrf2-p antibody. (D) INS-1 832/13 cells were incubated in 2 mM or 20 mM glucose for 6 h. RNA was extracted and expression of Nqo1 was measured. (E,F) INS-1 832/13 cells were incubated in 2 mM or 20 mM glucose and with indicated concentrations of brusatol for 72 h. Cells were fixed and immunolabeled using Nrf2 or Ki67 antibodies. (G,H) ) Islets from C57Bl/6 mice were isolated, dispersed and transduced with adenovirus expressing either LacZ or Cre, followed by immunostaining with insulin and Cre antibodies. Percentage of insulin and Cre positive cells was calculated. Data shown are the mean  $\pm$  SE (\*p < 0.05; \*\*p < 0.005; \*\*\*\*p < 0.0001).

**Supp. Figure 2. *In vivo* loss of Nrf2 function decreases HFD-stimulated  $\beta$ -cell proliferation.** (A) Mice were fed with HFD or RD. After one week, mice were euthanized and their pancreata were stained with insulin and Keap1 antibodies. Mean intensity was then calculated for Keap1. (B) MIP-CreER<sup>TAM</sup> mice were fed on HFD for one week and their pancreata was immunostained with Ki67 and insulin.  $\beta$ -cell proliferation was then analyzed. Data shown are the mean  $\pm$  SE (\*\*p < 0.005).

**Supp. Figure 3. Nrf2 deletion decreases insulin content *ex vivo*.**

Isolated islets from NRF2<sup>lox/lox</sup> mice were transduced with LacZ or Cre expressing adenoviruses and incubated in 20 mM glucose. After 72 h islets were (A,B) immunolabeled with insulin and mean intensity was calculated, or (C) measured for insulin content, or (D) RNA was extracted and expression of  $\beta$ -cell identity genes was measured. Data shown are the mean  $\pm$  SEM (\*p < 0.05; \*\*\*\*p < 0.0001).

**Supp. Figure 4. No differences of body weight or fasting blood glucose in  $\beta$ Nrf2KO mice after 1 month on a HFD.** (A) Body weight, (B) Fasting blood glucose, (C) glucose-stimulated insulin secretion was measured in  $\beta$ Nrf2KO mice fed on a HFD for 29 days. (D,E) an insulin tolerance test (ITT) was performed in *ad lib* fed mice and the area under the curve (AUC) was calculated. Data shown are the mean  $\pm$  SE (\*p < 0.05; \*\*p < 0.005; \*\*\*p < 0.0005).

**Supp. Figure 5. No differences of plasma insulin, body weight or blood glucose in  $\beta$ Keap1KO mice after 1 month on a HFD.** (A) Plasma insulin, (B) Non fasting, (C) fasting blood-glucose, (D) and Body weight were measured. (E,F) Insulin tolerance test (ITT) was performed in *ad lib* fed mice and the area under the curve (AUC) was calculated. Data shown are the mean  $\pm$  SE (\*\*\*\*p < 0.0001).

**Supp. Figure 6. CDDO-Me increases Nrf2 levels and stimulate  $\beta$ -cell proliferation in INS-1 832/13 cells** (A) INS1 cells were incubated with the indicated concentrations of CDDO-Me for 72 h, followed by the addition of Trypan blue. Viable cells (unstained cells) were counted under a light microscope. (B) INS1 cells were incubated with 20 nM CDDO-Me for 50 min, followed by immunolabeling using an Nrf2-p antibody. (C) C57BL/6 mouse islets were isolated, dispersed and incubated with 20 nM CDDO-Me. Following 24 h, RNA was isolated and mRNA for known Nrf2 target genes (C) and  $\beta$ -cell identity genes (D) were measured. (E) Immunodeficient mice were transplanted with 500 human islets under the kidney capsule. Following a 17-day recovery, daily IP-injections were made with the indicated doses of CDDO-Me for 1 week and kidney grafts were assayed for TUNEL. The percentage of insulin and TUNEL positive cells was calculated. Data shown are the mean  $\pm$  SE (\*p < 0.05, \*\*p < 0.005, \*\*\*\*p<0.0001).
